# Supplementary material for: Controlling the selectivity of bimetallic platinum–ruthenium nanoparticles supported on N-doped graphene by adjusting their metal composition
Source: Royal Society of Chemistry journal article supplement (doi:10.1039/d0cy02379e), 2021-01-01
Supplement: d0cy02379e1.pdf [file d0cy02379e1.pdf]

## † Electronic Supplementary Information (ESI)

# Controlling the Selectivity of Bimetallic Ruthenium-Platinum Nanoparticles Supported on N-Doped Graphene by Adjusting their Metal Composition

*Christian Cerezo-Navarrete,<sup>a</sup> Yannick Mathieu,<sup>a</sup> Marta Puche,<sup>a</sup> C. Morales,<sup>a</sup> Patricia  
Concepción,<sup>a</sup> Luis M. Martínez-Prieto<sup>\*a</sup> and Avelino Corma<sup>\*a</sup>*

<sup>a</sup> ITQ, Instituto de Tecnología Química, Universitat Politècnica de València (UPV), Av. de los  
Naranjos S/N 46022, Valencia, España

E-mails: [luismiguel.martinez@csic.es](mailto:luismiguel.martinez@csic.es) [acorma@itq.upv.es](mailto:acorma@itq.upv.es)

### Table of Content

|                                               |   |
|-----------------------------------------------|---|
| 1. ICP-AES                                    | 2 |
| 2. HRTEM                                      | 2 |
| 3. HAADF-STEM                                 | 3 |
| 4. Raman                                      | 4 |
| 5. XPS                                        | 4 |
| 6. Metal compositions of bimetallic catalysts | 7 |
| 7. Hydrogenation reactions                    | 7 |
| 8. TEM                                        | 7 |
| 9. "Hot filtration"                           | 8 |

## 1. ICP-AES

**Table S1.** Metal contents (wt%) and compositions (Pt:Ru molar ratio) of mono and bimetallic catalysts calculated by ICP-AES and XRF.<sup>a</sup>

| Catalizador                                           | Metal wt % | Pt wt % | Ru wt % | Pt:Ru molar ratio (theor.) | Pt:Ru molar ratio (exp.) |
|-------------------------------------------------------|------------|---------|---------|----------------------------|--------------------------|
| Ru/NH <sub>2</sub> -rGO                               | 2.5        | –       | 2.5     | -                          | -                        |
| Pt <sub>1</sub> Ru <sub>5</sub> /NH <sub>2</sub> -rGO | 2.4        | 0.7     | 1.7     | 1:5                        | 1:4.7                    |
| Pt <sub>1</sub> Ru <sub>1</sub> /NH <sub>2</sub> -rGO | 2.8        | 1.9     | 0.9     | 1:1                        | 1:1.1                    |
| Pt <sub>5</sub> Ru <sub>1</sub> /NH <sub>2</sub> -rGO | 2.9        | 2.6     | 0.3     | 5:1                        | 4.5:1                    |
| Pt/NH <sub>2</sub> -rGO                               | 2.4        | 2.4     | –       | -                          | -                        |

a. Ru and Pt contents (wt%) were determined by ICP-AES and XRF, respectively.

## 2. HRTEM

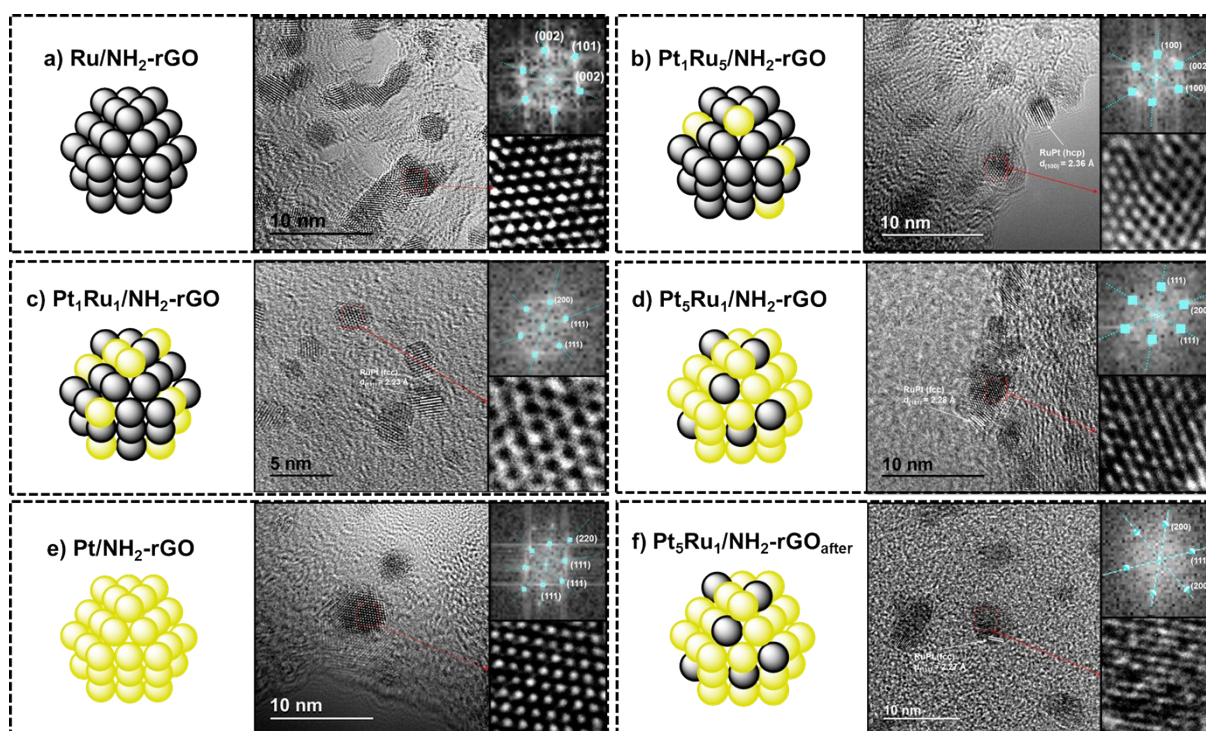

**Figure S1.** HRTEM micrographs (left, right bottom) and Fourier analysis (right, top) of (a) Ru/NH<sub>2</sub>-rGO, (b) Pt<sub>1</sub>Ru<sub>5</sub>/NH<sub>2</sub>-rGO (c), Pt<sub>1</sub>Ru<sub>1</sub>/NH<sub>2</sub>-rGO (d) Pt<sub>5</sub>Ru<sub>1</sub>/NH<sub>2</sub>-rGO, (e) Pt/NH<sub>2</sub>-rGO and (f) Pt<sub>5</sub>Ru<sub>1</sub>/NH<sub>2</sub>-rGO after catalysis.

### 3. HAADF-STEM

#### a) $\text{Pt}_1\text{Ru}_5/\text{NH}_2\text{-rGO}$

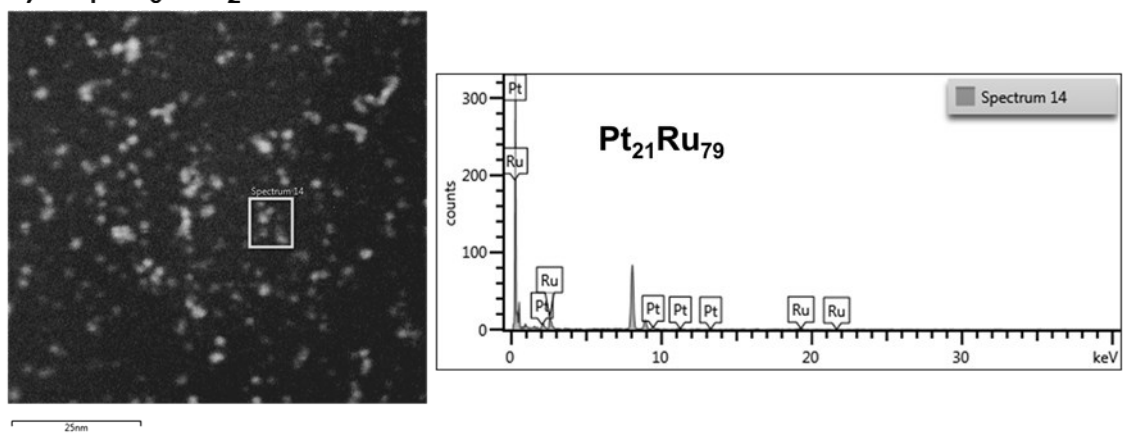

#### b) $\text{Pt}_1\text{Ru}_1/\text{NH}_2\text{-rGO}$

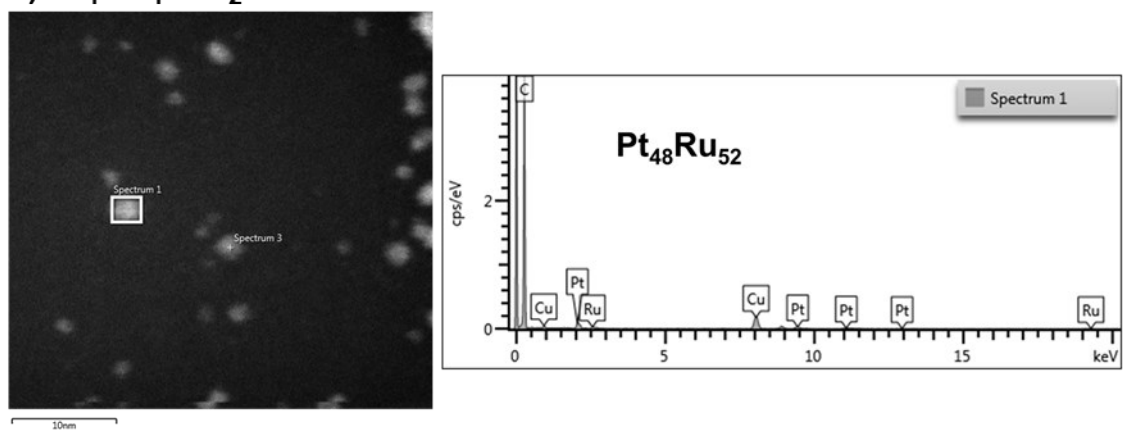

#### c) $\text{Pt}_5\text{Ru}_1/\text{NH}_2\text{-rGO}$

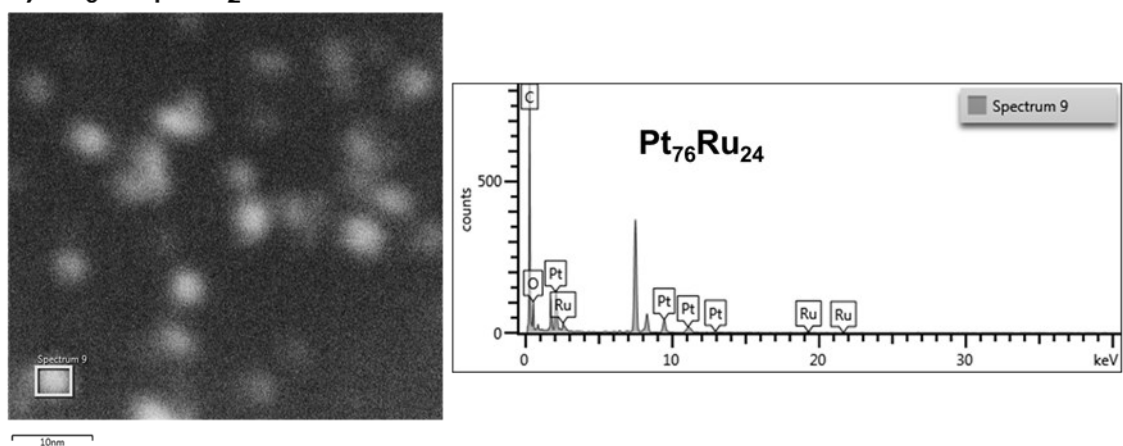

**Figure S2.** HAADF-STEM image (left) and relative composition of (a)  $\text{Pt}_1\text{Ru}_5/\text{NH}_2\text{-rGO}$ , (b)  $\text{Pt}_1\text{Ru}_1/\text{NH}_2\text{-rGO}$  and (c)  $\text{Pt}_5\text{Ru}_1/\text{NH}_2\text{-rGO}$  determined by EDX.

## 4. Raman

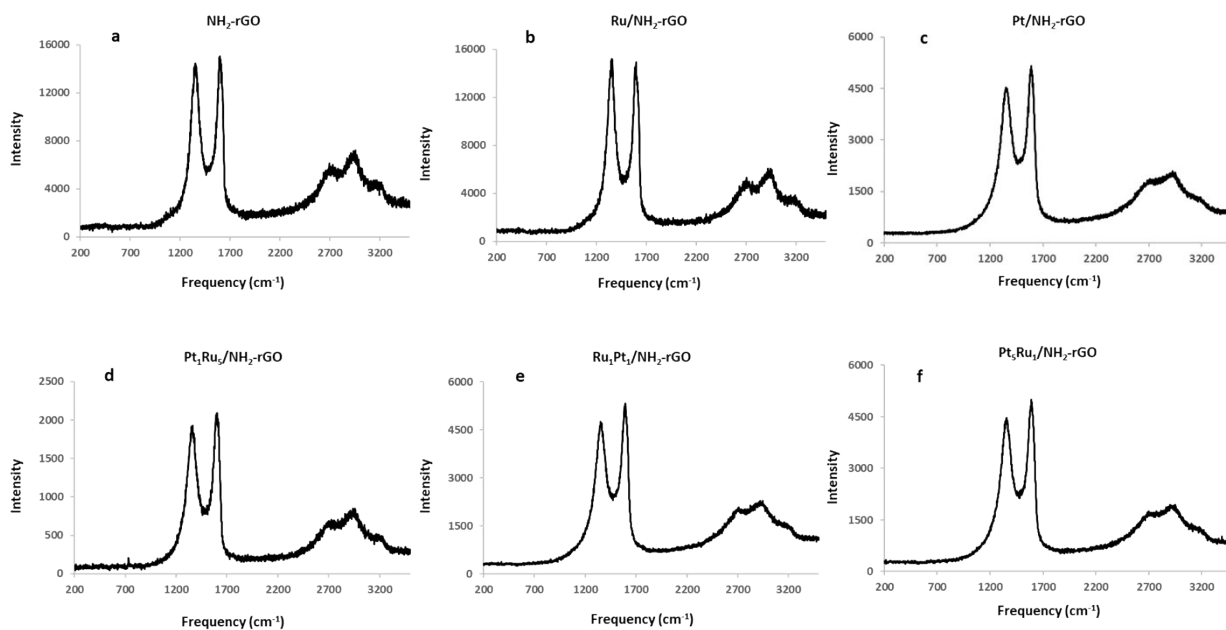

**Figure S3.** Raman spectrum of NH<sub>2</sub>-rGO (a), Ru/NH<sub>2</sub>-rGO (b), Pt/NH<sub>2</sub>-rGO (c), Pt<sub>1</sub>Ru<sub>5</sub>/NH<sub>2</sub>-rGO (d), Pt<sub>1</sub>Ru<sub>1</sub>/NH<sub>2</sub>-rGO (e), Pt<sub>5</sub>Ru<sub>1</sub>/NH<sub>2</sub>-rGO (f).

## 5. XPS

**Table S2.** Metal contents (wt%) and compositions (atomic % and molar ratios) of bimetallic catalysts calculated by XPS.

| Catalyst                                              | % <sub>at.</sub> Pt | % <sub>at.</sub> Ru | Pt:Ru molar ratio |
|-------------------------------------------------------|---------------------|---------------------|-------------------|
| Pt <sub>1</sub> Ru <sub>5</sub> /NH <sub>2</sub> -rGO | 28                  | 72                  | 1:4.3             |
| Pt <sub>1</sub> Ru <sub>1</sub> /NH <sub>2</sub> -rGO | 56                  | 44                  | 1.1:1             |
| Pt <sub>5</sub> Ru <sub>1</sub> /NH <sub>2</sub> -rGO | 78                  | 22                  | 4.7:1             |

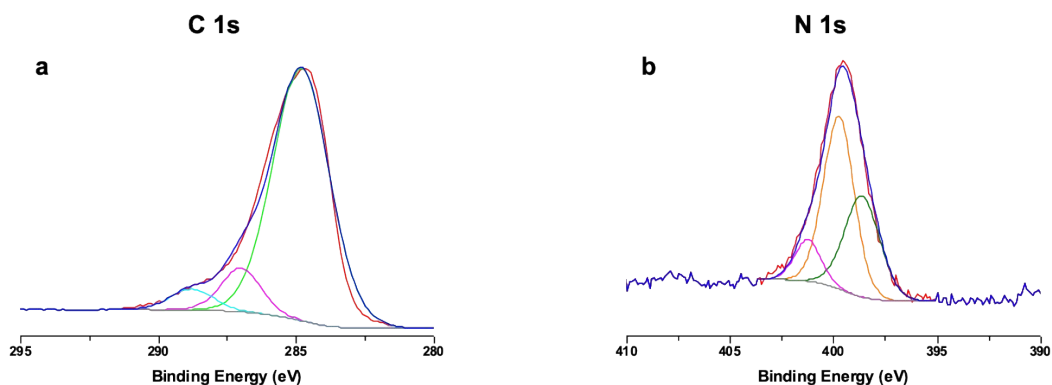

**Figure S4.** X-ray photoelectron spectroscopy (XPS) of the C 1s (a) and N 1s (b) signals of NH<sub>2</sub>-rGO

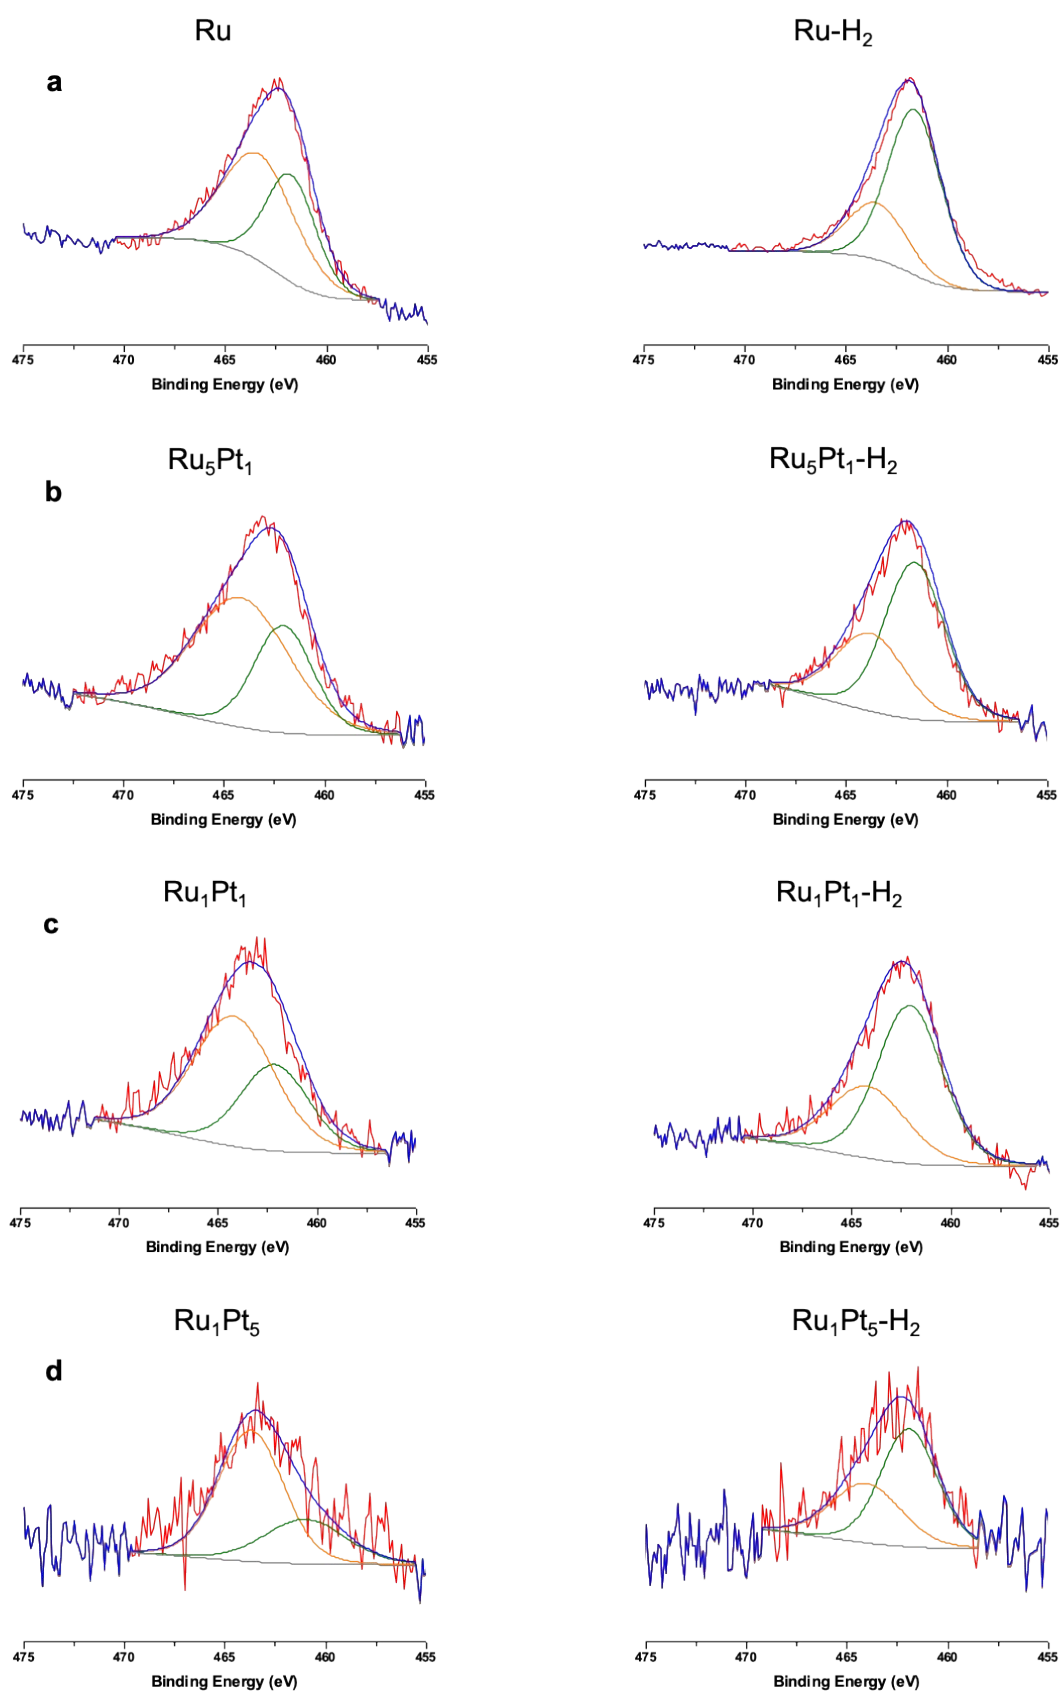

**Figure S5.** XPS of Ru 3p<sub>3/2</sub> area of Ru/NH<sub>2</sub>-rGO (a), Pt<sub>1</sub>Ru<sub>5</sub>/NH<sub>2</sub>-rGO (b), Pt<sub>1</sub>Ru<sub>1</sub>/NH<sub>2</sub>-rGO (c) and Pt<sub>5</sub>Ru<sub>1</sub>/NH<sub>2</sub>-rGO (d) before (left) and after reduction conditions (right).

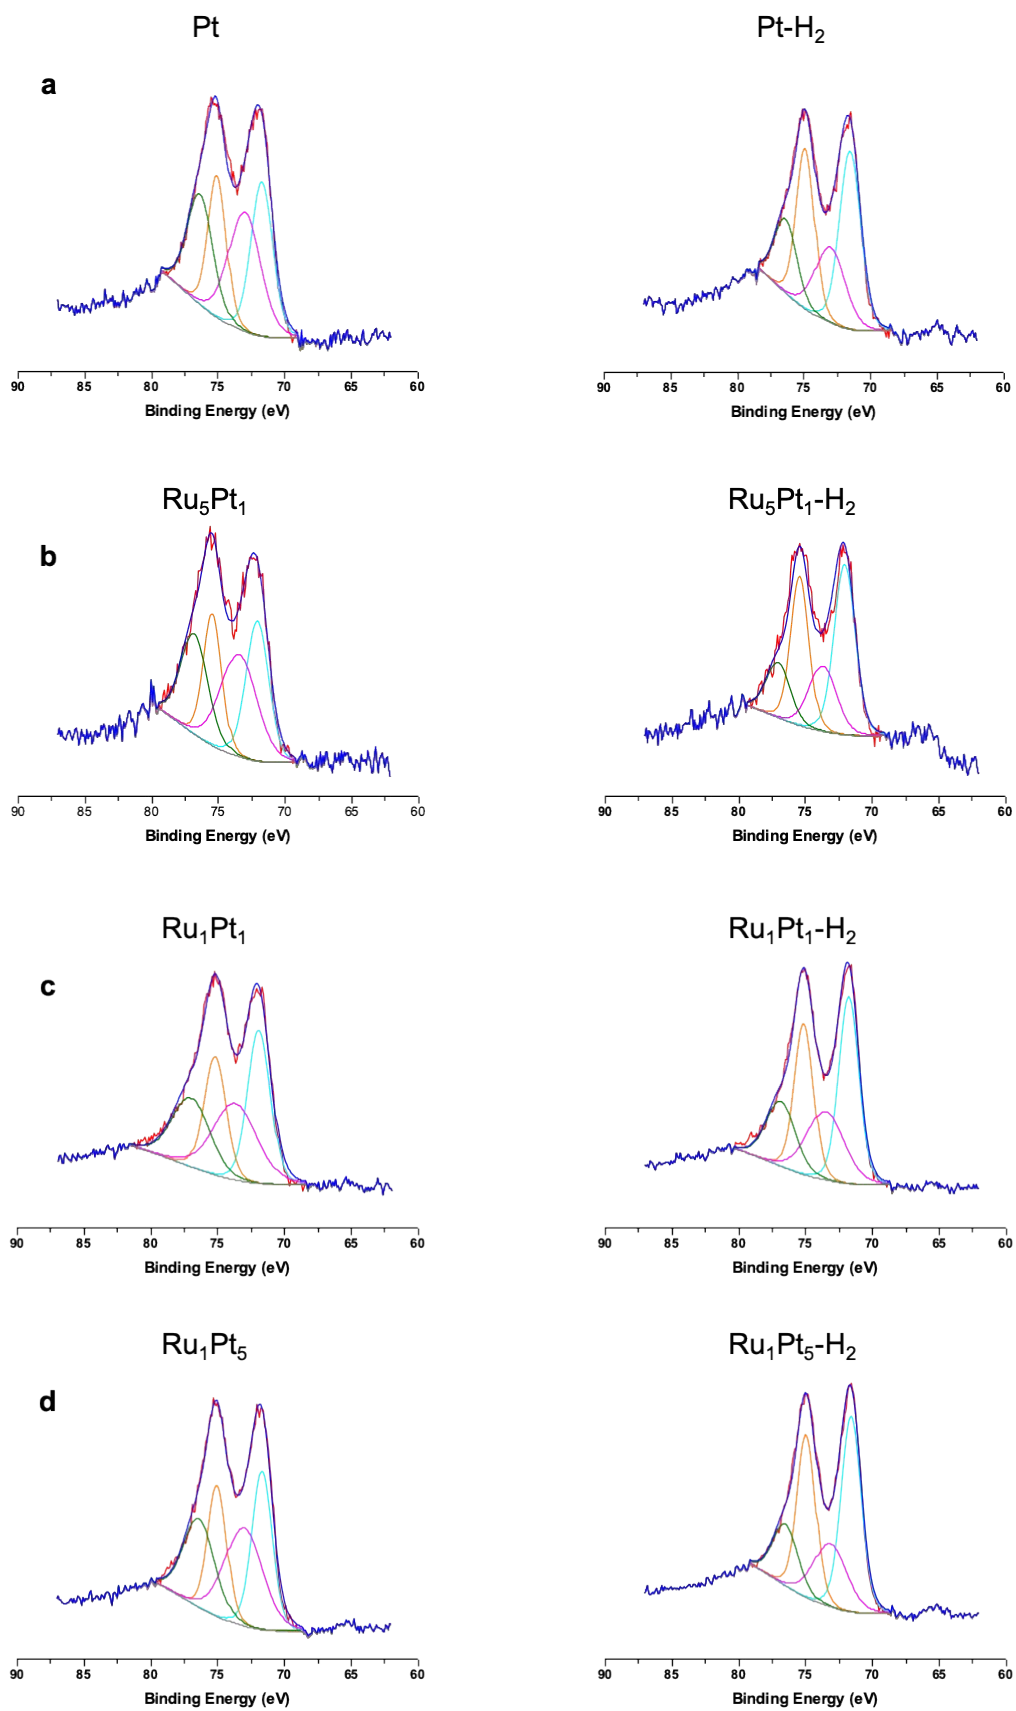

**Figure S6.** XPS of Pt 4f area of Pt/NH<sub>2</sub>-rGO (a), Pt<sub>1</sub>Ru<sub>5</sub>/NH<sub>2</sub>-rGO (b), Pt<sub>1</sub>Ru<sub>1</sub>/NH<sub>2</sub>-rGO (c) and Pt<sub>5</sub>Ru<sub>1</sub>/NH<sub>2</sub>-rGO (d) before (left) and after reduction conditions (right).

## 6. Metal compositions of bimetallic catalysts

**Table S3.** Comparison of the metal compositions (atomic % and molar ratios) of bimetallic catalysts determined by ICP-AES, XRF, EDX and XPS.

| Catalyst                                              | ICP-AES and XRF                                     |                     | EDX                                                 |                     | XPS                                                 |                     |
|-------------------------------------------------------|-----------------------------------------------------|---------------------|-----------------------------------------------------|---------------------|-----------------------------------------------------|---------------------|
|                                                       | Pt <sub>x</sub> Ru <sub>y</sub> (% <sub>at.</sub> ) | Pt:Ru (molar ratio) | Pt <sub>x</sub> Ru <sub>y</sub> (% <sub>at.</sub> ) | Pt:Ru (molar ratio) | Pt <sub>x</sub> Ru <sub>y</sub> (% <sub>at.</sub> ) | Pt:Ru (molar ratio) |
| Pt <sub>1</sub> Ru <sub>5</sub> /NH <sub>2</sub> -rGO | Pt <sub>22</sub> Ru <sub>78</sub>                   | 1:4.7               | Pt <sub>21</sub> Ru <sub>79</sub>                   | 1:4.7               | Pt <sub>28</sub> Ru <sub>72</sub>                   | 1:4.3               |
| Pt <sub>1</sub> Ru <sub>1</sub> /NH <sub>2</sub> -rGO | Pt <sub>45</sub> Ru <sub>55</sub>                   | 1:1.1               | Pt <sub>48</sub> Ru <sub>52</sub>                   | 1:1                 | Pt <sub>56</sub> Ru <sub>44</sub>                   | 1.1:1               |
| Pt <sub>5</sub> Ru <sub>1</sub> /NH <sub>2</sub> -rGO | Pt <sub>75</sub> Ru <sub>25</sub>                   | 4.5:1               | Pt <sub>76</sub> Ru <sub>24</sub>                   | 4.6:1               | Pt <sub>78</sub> Ru <sub>22</sub>                   | 4.7:1               |

## 7. Hydrogenation reactions

**Table S4:** Amount of catalyst added depending on the metal.

| Catalyst                                              | Mass (mg) |
|-------------------------------------------------------|-----------|
| Ru/NH <sub>2</sub> -rGO                               | 10        |
| Pt <sub>1</sub> Ru <sub>5</sub> /NH <sub>2</sub> -rGO | 12        |
| Pt <sub>1</sub> Ru <sub>1</sub> /NH <sub>2</sub> -rGO | 15        |
| Pt <sub>5</sub> Ru <sub>1</sub> /NH <sub>2</sub> -rGO | 18        |
| Pt/NH <sub>2</sub> -rGO                               | 20        |

## 8. TEM

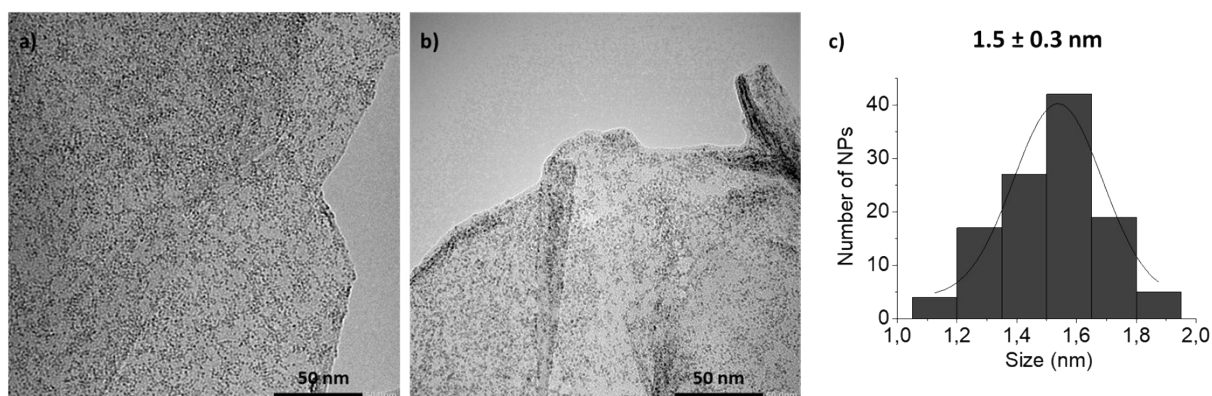

**Figure S7.** TEM micrographs (a, b) and the corresponding size histogram (c) of Ru-Bu<sub>3</sub>Sn/NH<sub>2</sub>-rGO.

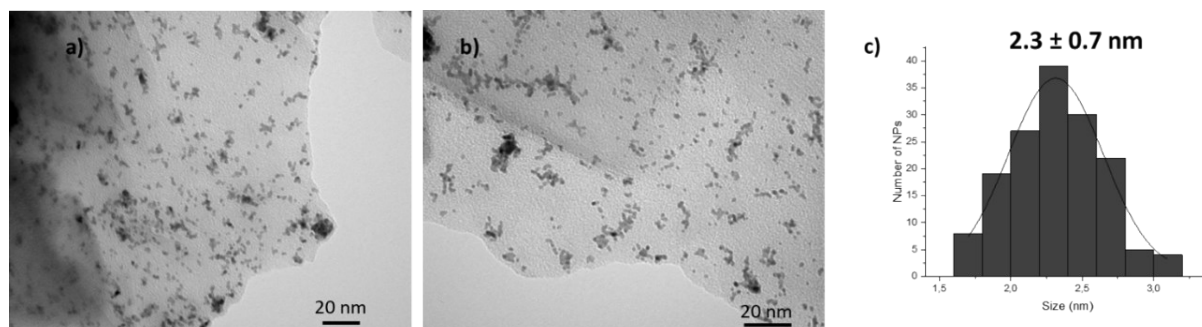

**Figure S8.** TEM micrographs (a, b) and the corresponding size histogram (c) of  $\text{Pt}_5\text{Ru}_1/\text{NH}_2\text{-rGO}$  after catalytic conditions (i.e. acetophenone hydrogenation, 130 °C, 50 bar  $\text{H}_2$ , 20h, THF).

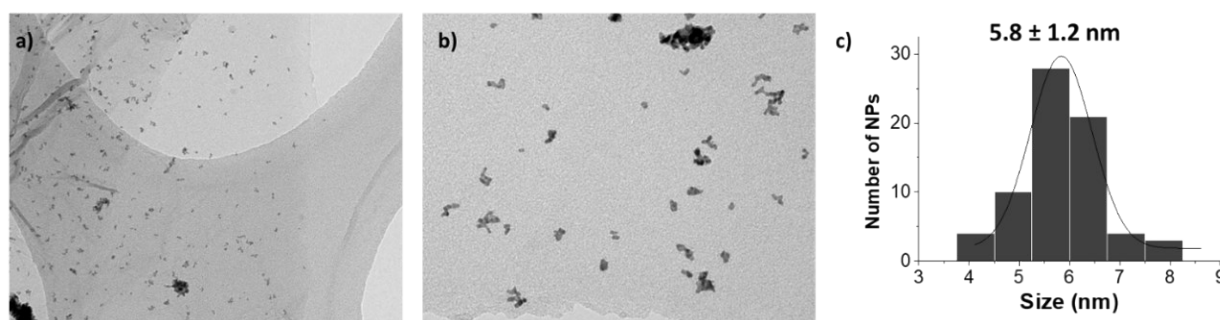

**Figure S9.** TEM micrographs (a, b) and the corresponding size histogram (c) of  $\text{Pt}_5\text{Ru}_1/\text{rGO}$  after catalytic conditions (i.e. acetophenone hydrogenation, 130 °C, 50 bar  $\text{H}_2$ , 20h, THF).

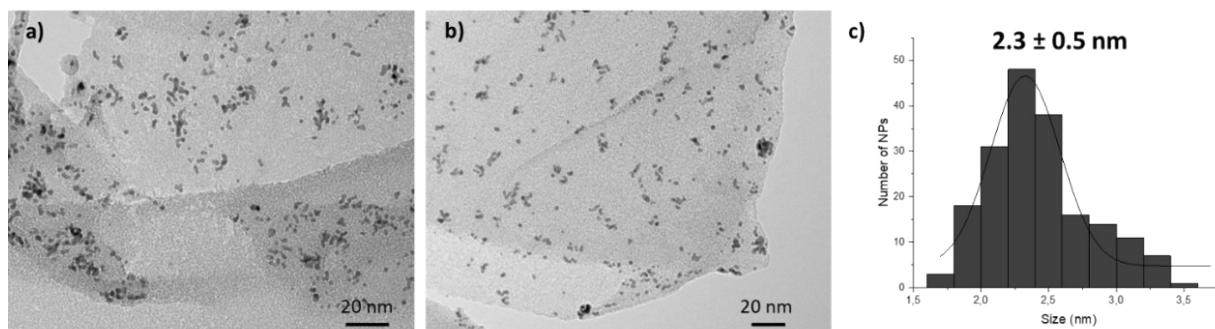

**Figure S10.** TEM micrographs (a, b) and the corresponding size histogram (c) of  $\text{Pt}_5\text{Ru}_1/\text{NH}_2\text{-rGO}$  after multiple addition experiment (i.e. nitrobenzene hydrogenation, 100 °C, 30 bar  $\text{H}_2$ , THF)

## 9. “Hot filtration”

**Table S5:** Conversions of  $\text{Pt}_5\text{Ru}_1/\text{NH}_2\text{-rGO}$  in the hydrogenation of HMF after thermal filtration<sup>a</sup> and in the presence of catalyst.<sup>b</sup>

| Catalyst                                          | 50 min | 4 h  |
|---------------------------------------------------|--------|------|
| $\text{Pt}_1\text{Ru}_5/\text{NH}_2\text{-rGO}^a$ | 63 %   | 63 % |
| $\text{Pt}_1\text{Ru}_5/\text{NH}_2\text{-rGO}^b$ | 62 %   | 94%  |
